# Supplementary material for: LesionTracker: Extensible Open-Source Zero-Footprint Web Viewer for Cancer Imaging Research and Clinical Trials
Source: Oxford University Press journal article supplement (doi:10.1158/0008-5472.can-17-0334), 2017-10-31
Supplement: 00085472can170334-sup-178441_2_supp_4190120_ss2t0y.docx [file 00085472can170334-sup-178441_2_supp_4190120_ss2t0y.docx]

**Supplementary Data**

**Video file** demonstrating workflow and functionality of the LesionTracker user interface, with audio voice over description of a typical use case scenario.

**Supplementary Figure 1** demonstrates lesion labeling for a baseline timepoint assessment in LesionTracker. The lesion labels are organized by organ group and allow the image reviewer to add an optional free text description.

**Supplementary Figure 2** provides an example of the tumor metrics report available in LesionTracker. The report includes lesion labels, target measurements, non-target status, series and image numbers, as well as annotated images.
